# Supplementary material for: A method for estimating localized CO 2 emissions from co-located satellite XCO 2 and NO 2 images
Source: Copernicus journal article supplement (doi:10.5194/egusphere-2023-2085), 2023-09-27
Supplement: Supplementary file [file egusphere-2023-2085-AC2-supplement.pdf]

## Point-by-point response to the reviewer’s comments

We thank the reviewer Christopher O’Dell for the comments and suggestions provided, which have improved the quality of the manuscript. We have considered all the suggested improvements:

### General comments

**Comment 1:** As the authors point out, numerous papers have tried to use CO<sub>2</sub> simultaneously with NO<sub>2</sub> to quantify CO<sub>2</sub> emission rates from power plants. In principle, you can use CO<sub>2</sub> alone (as Nasser et al, 2017, 2022 does) or NO<sub>2</sub> alone (by assuming you know the emission rate). There are thus many ways to “mix and match” the information provided by the NO<sub>2</sub> observations and the CO<sub>2</sub> observations. A small discussion of the different assumptions one could make – and their associated “pros” and “cons” – would be most welcome somewhere in the paper, and what assumptions you personally chose. It appears that you (Page 6, line 148) only use NO<sub>2</sub> to identify a region containing an emission plume – i.e. it is only used in a purely qualitative sense. Please clarify this in the paper. Do you use NO<sub>2</sub> to localize the spot of the source? Or do you use the well-known coordinates of the Belchatow station? For instance, Hakkarainen et al (2023) in their “Building a Bridge” paper seem to simultaneously fit Gaussians to both the NO<sub>2</sub> and CO<sub>2</sub> CS’s, and then use them to somehow construct an effective NO<sub>x</sub>-to-CO<sub>2</sub> ratio, which is (somehow) used to constrain the power plant CO<sub>2</sub> flux. But even their paper is not very clear on this point.

**Reply:** A small discussion of the different approaches to quantify CO<sub>2</sub> emissions from observations of CO<sub>2</sub> alone, NO<sub>2</sub> alone and a combination of both was included in the introduction (L44-63 of the revised version).

A clarification of our use of NO<sub>2</sub> to only identify a region containing an emission plume was added in L61.

The coordinates of the Belchatow power station are considered well-known and used as an input. This was clarified in L160 (of the revised version).

**Comment 2:** It would be useful to expand your discussion of the pros and cons of your cross-sectional method (similar to that of Hakkarainen et al but more automated) and the more conventional Gaussian-plume model fit. Since the latter “fits all the data at once” it seems intuitively like it might avoid some of the errors your method is subject to, such as those caused

by dispersion. But perhaps not – it seems very different to say. It implies an OSSE study with LES-model-generated plumes might be warranted, to investigate the pros and cons of these different techniques.

**Reply:** A slightly expanded discussion of pros and cons of a cross-sectional flux method vs a Gaussian-plume model fit was included from L74 (of the revised version) onwards.

In a cross-sectional flux method, if the emission rate is computed from the mean of a set of independent cross-sectional fluxes, any random errors, in theory, average out. On the other hand, a Gaussian-plume model fit is based on the assumption of a steady state and therefore neglects turbulent plume structures. However, if the plume deviates from this steady-state behaviour, as is often the case at daytime (as seen e.g. in simulated plumes, Brunner et al, 2023, Figs. 2, 3) a Gaussian model might fail to describe the real plume structure. Therefore, in such cases, fitting “all the data at once” might not have any advantages over studying a set of cross-sectional fluxes, because there is no apparent reason why emission estimates obtained through the mean of independent cross-sectional fluxes would contain more errors than those obtained by means of a Gaussian fit. Our cross-sectional flux method has the additional advantage of not assuming a plume shape or behaviour other than weak stationarity, allowing us to estimate an uncertainty associated to intra-plume structures from the analysis of the cross-sectional fluxes dispersion. On the other hand, the emission estimate uncertainty obtained from a Gaussian fit is likely underestimated if the deviation from the steady-state assumption is not included in it.

Therefore, not considering an overall Gaussian fit does not in theory imply more errors in the results, but the possibility to quantify them. However, as suggested, an OSSE study with LES-model-generated plumes would probably help to clarify this point.

**Comment 3:** Comment on how much of this was automated vs. “Done by eye”. It seems like the authors are trying to largely automate the technique but this is not entirely clear. A seemingly big advantage of this study is the amount of automation put into this work, such that it could potentially be applied to future sensors such as CO2M. I strongly recommend emphasizing the automation aspect of this work in the abstract.

**Reply:** Thank you for the suggestion. We explicitly mentioned the automation of the method in the abstract and in the method description.

In principle, besides the input datasets illustrated in Fig. 2, the coordinates of the source and the parameters mentioned in the description of

the method are used as an input. Additionally, the bottom-up CO<sub>2</sub> intensity was manually computed and given as an input. That all set up, the described analysis runs automatically for all the available scenes within the selected time period.

## Specific Comments

**Comment 4:** Sect 2.2: Your equations are all in terms of VCDs. You seem to be assuming locally flat ground. What is the topography in the region is significant? The VCD will generally scale proportionally to the surface pressure, assuming CO<sub>2</sub> and NO<sub>2</sub> are well mixed in the boundary layer. This will imprint topography on the VCD map. Can you please comment on how you account for this?

**Reply:** The elevation in analysed region varies typically less than 75 m, having maximum elevation differences in the order of 200 m. VCD maps do contain this imprinted topography. For the potential plume detection (using NO<sub>2</sub> data), we can neglect this effect for the small height difference about the Belchatow power plant. We can illustrate that as follows. Let us consider the VCD with respect to altitudes  $z$  and  $z + \Delta z$ . Assuming that NO<sub>2</sub> is well mixed in the boundary layer and hydrostatic balance, the number of air molecules exponentially decreases with altitude,  $\text{VCD}(z + \Delta z) = \text{VCD}(z) e^{-\Delta z/H}$ , where  $H \approx 8.5$  km is the atmospheric scale height. The effect of topography for individual VCD considering  $\Delta z = 0.2$  km would lead to  $\text{VCD}(z) - \text{VCD}(z + \Delta z) \approx 0.02 \text{ VCD}(z)$ . Therefore, the effect of topography for this scene is about 2 orders of magnitude smaller than VCD, while typical VCD errors and background standard deviation are about 0.2-0.3 VCD( $z$ ). Since we use NO<sub>2</sub> VCD only for the detection of a potential plume through a statistical test, and the NO<sub>2</sub> VCD is much larger than the topography effect, the NO<sub>2</sub> VCD error is the deciding factor when selecting the enhanced NO<sub>2</sub> VCD.

For the computation of the cross-sectional fluxes, we need the VCD containing the imprinted topography. We converted the XCO<sub>2</sub> anomaly to VCD through  $n_d$  (the number of dry air molecules per unit area). This  $n_d$  was obtained from ERA5 at the centre coordinates of each OCO-3 pixel taking the Earth's surface altitude from the L2 Lite OCO-3 product. Therefore, the topography of the region was considered to compute the VCD from the XCO<sub>2</sub> anomaly.

**Comment 5:** P8, L165: Will this NO<sub>2</sub> smoothing potentially make the plume wider than it really is? Did you consider this effect, or can you comment on if it negligible?

**Reply:** NO<sub>2</sub> smoothing can make the plume wider. A widening of the NO<sub>2</sub> detected plume would translate into less constraint of the region to detect the CO<sub>2</sub> plume.

This widening is negligible if the widened plume does not include emission plumes arising from other sources or other enhanced XCO<sub>2</sub> background structures of about the same spatial extent as the CO<sub>2</sub> plume. The widening becomes relevant if there are other emission sources or background XCO<sub>2</sub> structures close to the emission plume, since they are more likely to be included in the potential plume, leading to a potential inclusion of these XCO<sub>2</sub> enhancements in the CO<sub>2</sub> detected plume and consequently to an overestimation of the emission rate. The size of the widening is dependent on the TROPOMI pixel size and has at most the diametral size of two TROPOMI pixels. Because TROPOMI pixels become larger in the across-flight direction, this widening is more pronounced towards the edges of the TROPOMI swath. That is why, in the scene selection procedure, in order to minimize this effect, we discarded scenes for which a large fraction of the TROPOMI pixels belonged to the most off-nadir pixels of the swath.

**Comment 6:** P213, near L275: You should also mention that the wind speed and direction can easily vary over 1-3 hours. It seems like this is quite common and will certainly distort the plume and lead to flux inference errors. I would think this would lead to fairly coherent variability of the type that figure 5b exhibits. You take great pains to estimate the error due to variability in the source flux  $F$ ; why not do the same for potential variations in the wind over the 1-3 hour period defining the plume length? At the very least, this should be commented on. Note that this is somewhat different than a mean bias error in the wind speed, such as you consider in section 2.3. Although perhaps this is inherently taken into account by your “dispersion uncertainty calculation”, wherein you empirically estimate the covariance function from the semi-variogram of the data itself?

**Reply:** Any oscillations in the wind speed and direction about their value at overpass time are considered in the dispersion uncertainty. So is, to a certain extent, a drift in the wind speed. A drift in the wind speed would translate into a drift in the obtained cross-sectional fluxes, which would lead to a larger empirical semivariances (whose increase is larger for larger lags) and therefore a larger dispersion uncertainty. Therefore, we can assume

that small drifts in the wind speed (i.e. those which would lead to drifts in the cross-sectional fluxes that are much smaller than their oscillations along the plume track) are taken into account in the dispersion uncertainty. For example, as mentioned in L576-584 (of the revised version), for a relatively large decrease by  $1 \text{ m s}^{-1}$  in the wind speed along the plume track, from a typical wind speed of about  $6 \text{ m s}^{-1}$  and emissions of about  $30 \text{ MtCO}_2 \text{ y}^{-1}$ , a drift by about  $5 \text{ MtCO}_2 \text{ y}^{-1}$  would be expected for individual cross-sectional fluxes, which is much smaller than the oscillations observed. However, a significant drift in the wind vector would mean a departure from the weak-stationarity assumption, under which we have computed the mean emission estimate and its uncertainty from the semivariogram.

**Comment 7:** Section 2.3: I think you also should include a measurement uncertainty term. Currently there is no term that represents potential biases in the measurements, or if there is, I can't see it. According to Nassar et al's work, this term is not usually large, but warrants at least commenting on it in the paper.

**Reply:** We added the following comment on this in L314 (of the revised version): "We did not explicitly consider a XCO<sub>2</sub> measurement error under the assumption that, at the relatively small scales of the analysed scenes, any bias in the XCO<sub>2</sub> data is corrected for when subtracting the background. Random errors in the XCO<sub>2</sub> values are included in the dispersion uncertainty."

**Comment 8:** Section 2.3.1 and Figure 9: It seems like your dispersion uncertainty can often be extremely large and dominate the overall uncertainty. The discussion in this section, however, is fairly technical and contains no plots that give the reader evidence that you've done this correctly. I think plotting semi-variograms and the overlaid fits would help, especially if you compared two very different cases, such as 17-April-2020 (very large dispersion uncertainty) and 20-June-2021 (small dispersion uncertainty).

**Reply:** A new figure, Fig. A9, showing the semi-variograms for all analysed scenes was added to Appendix A.

The low uncertainty on 20 June 2021 is, as discussed in L583 (of the revised version), probably an underestimation due to low number of valid CSs with large gaps without information.

**Comment 9:** Section 2.3.2: I'm not crazy about  $0.5 \text{ m/s}$  as a 1-sigma mean wind uncertainty. I prefer the Nassar et al (2017,2022) approach

using MERRA-2 – ERA5, though it would be better to include a floor of 0.5 for the reasons you state. It would be nice if you could comment on this methodological difference in this subsection.

**Reply:**

Taking an ensemble approach of only two products (MERRA-2 and ERA5) might be insufficient to characterize the true uncertainty or the wind speed, since it will be affected by random errors from both products and thus also oscillate randomly, not necessarily representing a true uncertainty.

Additionally, MERRA-2 provides 3h averages of the wind vector while ERA 5 winds are hourly instantaneous values. Because of this, MERRA-2 winds are likely to have less variability than ERA5 winds, so the difference MERRA-2 – ERA5 might overestimate the uncertainty.

We included a mention of the methodological difference in Sec. 2.3.2.

**Comment 10:** P25, L517: The location of the lignite pit is poorly represented by the v10.4 OCO-3 digital elevation map, and leads to time-independent biases over those locations. This general issue is discussed in Jacobs et al., 2023 (<https://amt.copernicus.org/preprints/amt-2023-151/>). At the end of these comments, I’ve attached a figure made by the OCO team showing the effects of a change in DEM on this feature. Therefore, I think it is fully warranted to filter out these spatial samples around the pit by hand, or the full case-filtering approach you describe.

**Reply:** Thank you for this information. We have not yet performed any detailed study on DEM effects, but using an accurate DEM will reportedly help to reduce biases in the XCO2 product and in the emission estimate when using this product.

## Technical Comments

**Comment 11:** P2, L38: need “e.g.” before Reuter et al, Nassar et al citations. There have been many such publications and these are simply examples. This is the case in many places throughout the paper. Such as P2, L43; I doubt Ciaia was the first author to note the long lifetime of CO2 in the atmosphere! The rule I use is this. If a paper was the first to say or show something you cite it directly. If the paper is merely an example of many such papers saying the same thing, and was not the first, you need “e.g.”.

**Reply:** That is a reasonable rule. We changed that accordingly at several places throughout the paper.

**Comment 12:** P7, Fig3: It is VERY hard to see the “grey lines” of the SAM scan. Please modify to make a little more visible.

**Reply:** We made the grey lines more visible in Figs.3-8 and Figs. A1-A5.

**Comment 13:** P25, L515: “in 0.3” → “by 0.3”

**Reply:** We corrected ”in” to ”by”.
